# Supplementary material
Source: PubMed Central journal article supplement (PMC7912541)
Supplement: NIHMS1622226-supplement-5.pdf [file NIHMS1622226-supplement-5.pdf]

526

527 SUPPLEMENTAL MATERIAL

528

**Table S1. Pre-Treatment Goodness of Fit for Synthetic Controls**

| State                 | Differences in Pre-Treatment<br>RMSPE* (p-value)** |
|-----------------------|----------------------------------------------------|
| Rhode Island (2014)   | 0.5241                                             |
| Connecticut (2012)    | 0.7336                                             |
| New York (2010)       | 0.4329                                             |
| North Carolina (2010) | 0.3706                                             |
| Illinois (2010)       | 0.6395                                             |

\*RMSPE = Root Mean Squared Prediction Error. RMSPE measures differences between trends in the outcome between exposed states and synthetic controls.  
P<0.05 suggests pre-treatment differences

\*\*P-value based on a t-test comparing exposed state to pool of controls

529 **Figure S1. Firearm Homicide Incidence Rate Difference (IRD) by Year between Exposed States**  
530 **and Synthetic Controls**

531

532 **Figure S2. Firearm Incidence Rate Difference (IRD) for Exposed States and Placebo Runs of**  
533 **Controls**

534

535 **Figure S3. Firearm Homicide Rate per 100,000 in Illinois and Synthetic Control, 2007-2015**

536

537 **Figure S4. Chicago vs. Cook County vs. Illinois Fatal Motor Vehicle Collisions with and**  
538 **without Alcohol Involved, 1999-2017**

539
